# Supplementary material for: Status of Environmental Life Cycle Assessment (LCA): A Case Study of South Korea
Source: MDPI journal article supplement (doi:10.3390/su13116234), 2021-06-01
Supplement: s1 [file s1]

**Table S1** Summary of South Korea's water footprint studies found online (2000 – 2019)

| s/n | Product             | Sector      | Accessibility | Source           | Reference          |
|-----|---------------------|-------------|---------------|------------------|--------------------|
| 1.  | Food                | Agriculture | Paid          | Journal          | Yoo et al. (2016)  |
| 2.  | Crops and livestock | Agriculture | Free          | Journal          | Kim and Kim (2019) |
| 3.  | Rice                | Agriculture | Paid          | Journal          | Yoo et al. (2014)  |
| 4.  | Rice                | Agriculture | Free          | Conference paper | Yoo et al. (2011)  |
| 5.  | Rice                | Agriculture | Paid          | Journal          | Lee et al. (2018b) |
| 6.  | White radishes      | Agriculture | Free          | Journal          | Cha et al. (2017)  |
| 7.  | Crops               | Agriculture | Paid          | Journal          | Lee et al. (2016)  |
| 8.  | Grain crops         | Agriculture | Paid          | Journal          | Yoo et al. (2012)  |
| 9.  | Rice                | Agriculture | Free          | Journal          | Lee et al. (2018a) |

**Table S2** Summary of South Korea's carbon footprint studies found online (2000 – 2019)

| s/n | Product                                   | Sector      | Accessibility | Source  | Reference              |
|-----|-------------------------------------------|-------------|---------------|---------|------------------------|
| 1.  | Packaging films                           | Electronics | Free          | Journal | Choi et al. (2018a)    |
| 2.  | Energy storage systems                    | Energy      | Paid          | Journal | Sasikala et al. (2019) |
| 3.  | Electrical and electronic equipment (EEE) | Electronics | Paid          | Journal | Park et al. (2019)     |

|     |                              |                |      |         |                      |
|-----|------------------------------|----------------|------|---------|----------------------|
| 4.  | Vehicles                     | Automotive     | Paid | Journal | Seo et al. (2018)    |
| 5.  | Buildings                    | Construction   | Paid | Journal | Sim and Sim (2017b)  |
| 6.  | Solid waste                  | Energy         | Free | Journal | Kim et al. (2016c)   |
| 7.  | Building materials           | Construction   | Free | Journal | Kim et al. (2016f)   |
| 8.  | Power generation             | Energy         | Paid | Journal | Yeo and Kim (2016)   |
| 9.  | Solid waste                  | Energy         | Free | Journal | Lee et al. (2015a)   |
| 10. | Bottom ash and dredged soils | Construction   | Paid | Journal | Noh et al. (2015)    |
| 11. | Roads                        | Construction   | Paid | Journal | Ryu et al. (2013)    |
| 12. | Population density           | Government     | Paid | Journal | (Kim and Kim (2013)) |
| 13. | Electricity consumption      | Energy         | Paid | Journal | Hong et al. (2012)   |
| 14. | Solid waste                  | Energy         | Paid | Journal | Yi et al. (2011)     |
| 15. | Buildings                    | Energy         | Free | Journal | Wi et al. (2019)     |
| 16. | Municipal solid waste        | Energy         | Paid | Journal | Yi (2019)            |
| 17. | Food waste                   | Energy         | Free | Journal | Jeong et al. (2019)  |
| 18. | Industrial waste             | Energy         | Paid | Journal | Kim et al. (2018b)   |
| 19. | Energy policies              | Government     | Free | Journal | Kim and Yu (2018)    |
| 20. | Municipal solid waste        | Energy         | Paid | Journal | Kim et al. (2016b)   |
| 21. | Subway                       | Transportation | Paid | Journal | Ahn et al. (2016)    |
| 22. | Rice                         | Agriculture    | Paid | Journal | Kim et al. (2016a)   |
| 23. | Industrial waste             | Energy         | Paid | Journal | Lim et al. (2016)    |

---

|     |                            |              |      |                  |                      |
|-----|----------------------------|--------------|------|------------------|----------------------|
| 24. | Magnesium metal            | Automotive   | Paid | Journal          | Kwon et al. (2015)   |
| 25. | Rice paddy soils           | Agriculture  | Paid | Journal          | Ali et al. (2015)    |
| 26. | Gasoline and diesel        | Energy       | Paid | Journal          | Jang and Song (2015) |
| 27. | Rice                       | Agriculture  | Paid | Journal          | Kang et al. (2015)   |
| 28. | Fertilizer                 | Agriculture  | Free | Journal          | Chen et al. (2015)   |
| 29. | Straw bales and rice hulls | Agriculture  | Free | Journal          | Lee and Yeom (2015)  |
| 30. | Building materials         | Construction | Paid | Journal          | Choi et al. (2014)   |
| 31. | Building materials         | Construction | Paid | Journal          | Roh et al. (2014)    |
| 32. | Geotextile tubes           | Construction | Paid | Conference paper | Yee et al. (2014)    |
| 33. | Natural gas                | Energy       | Paid | Journal          | Choi and Song (2014) |

---
